# Supplementary material for: Designing green-emissive Cu,N-codoped carbon dots by pyrolysis of aromatic precursors and application in sensing of Fe(iii) and Cr(vi)
Source: Royal Society of Chemistry journal article supplement (doi:10.1039/d6ra00625f), 2026-04-30
Supplement: d6ra00625f1.pdf [file d6ra00625f1.pdf]

## Supporting Information

### Designing green-emissive Cu,N-co-doped carbon dots by pyrolysis of aromatic precursors and application in sensing of Fe(III) and Cr(VI)

Thien-Phuc Nguyen<sup>a</sup>, Nhu Vo Thi Thu <sup>a</sup>, Minh Hao Hoang <sup>a</sup>, Nham Linh Nguyen <sup>a</sup>, Nguyen Thanh Sang <sup>a</sup>, Dat Nguyen <sup>a</sup>, Ly Tan Nhiem <sup>a</sup>, Thanh Tuyen Nguyen <sup>a</sup>, Phuong V. Pham <sup>b</sup>, and Dinh Khoi Dang<sup>\*a</sup>

<sup>a</sup> Faculty of Chemical and Food Technology, Ho Chi Minh City University of Technology and Engineering, 01 Vo Van Ngan Street, Thu Duc Ward, Ho Chi Minh City, 700000, Vietnam.

<sup>b</sup> Department of Physics, National Sun Yat-sen University, Kaohsiung 80424, Taiwan.

\* Corresponding Author: D. K. Dang, E-mail: [khoidd@hcmute.edu.vn](mailto:khoidd@hcmute.edu.vn).

**Table S1.** Buffer solutions

| pH        | Salt mixture                                                          | Dilute with deionized water to |
|-----------|-----------------------------------------------------------------------|--------------------------------|
| <b>1</b>  | 0.3725g KCl and 67mL of 0.20M HCl                                     | 100mL                          |
| <b>2</b>  | 0.3725g KCl and 6.5mL of 0.20M HCl                                    | 100mL                          |
| <b>3</b>  | 1.021g potassium hydrogen phthalate and 11.15mL of 0.20M HCl          | 100mL                          |
| <b>4</b>  | 1.021g potassium hydrogen phthalate and 0.05mL of 0.20M HCl           | 100mL                          |
| <b>5</b>  | 1.021g potassium hydrogen phthalate and 11.3mL of 0.20M NaOH          | 100mL                          |
| <b>6</b>  | 6.81g potassium dihydrogen phosphate and 23mL of 0.20M NaOH           | 1000mL                         |
| <b>7</b>  | <b>6.81g potassium dihydrogen phosphate and 145.5mL of 0.20M NaOH</b> | <b>1000mL</b>                  |
| <b>8</b>  | 0.681g potassium dihydrogen phosphate and 23.35mL of 0.20M NaOH       | 100mL                          |
| <b>9</b>  | 0.477g sodium tetraborate and 2.3mL of 0.20M HCl                      | 100mL                          |
| <b>10</b> | 0.477g sodium tetraborate and 9.15mL of 0.20M NaOH                    | 100mL                          |
| <b>11</b> | 0.21g sodium bicarbonate and 11.35mL of 0.20M NaOH                    | 100mL                          |
| <b>12</b> | 0.3725g KCl and 6mL of 0.20M NaOH                                     | 100mL                          |
| <b>13</b> | 0.3725g KCl and 66mL of 0.20M NaOH                                    | 100mL                          |

**Table S2.** QY calculated for Cu,N-CDs

| Sample          | Intergrated emission intensity (I) | Optical density (A) | Refractive index (n) | Quantum yield (QY) |
|-----------------|------------------------------------|---------------------|----------------------|--------------------|
| Quinine sulfate | $104 \times 10^7$                  | 0.207               | 1.33                 | 0.54 (known)       |
| Cu,N-CDs        | $9 \times 10^7$                    | 0.065               | 1.33                 | 0.15               |

$$Q = Q' \times \frac{A'}{I'} \times \frac{I}{A} \times \frac{n^2}{n'^2}$$

$$Q = 0.54 \times \frac{0.207}{104 \times 10^7} \times \frac{9 \times 10^7}{0.065} = 0.149$$

**Table S3.** Reference papers reported carbon dots and its QY

|   | <b>Precursors</b>                                        | <b>Method</b>                                 | <b>QY (%)</b> | <b>Reference</b> |
|---|----------------------------------------------------------|-----------------------------------------------|---------------|------------------|
| 1 | Citric acid, urea                                        | Hydrothermal microwave-assisted pyrolysis     | 19.0          | (1)              |
| 2 | Morus alba L. leaves                                     | Hydrothermal                                  | 9.3           | (2)              |
| 3 | Glucose, ammonia                                         | Continuous hydrothermal flow synthesis (CHFS) | 9.6           | (3)              |
| 4 | Tartaric acid, urea                                      | Solid-phase thermal method                    | 10.5          | (4)              |
| 5 | Ammonium citrate                                         | Hydrothermal                                  | 13.5          | (5)              |
| 6 | Calcium citrate, urea                                    | Microwave assisted                            | 10.1          | (6)              |
| 7 | <b>p-Aminosalicylic acid, copper(II) acetylacetonate</b> | <b>Solvent-free pyrolysis</b>                 | <b>14.9</b>   | <b>This work</b> |

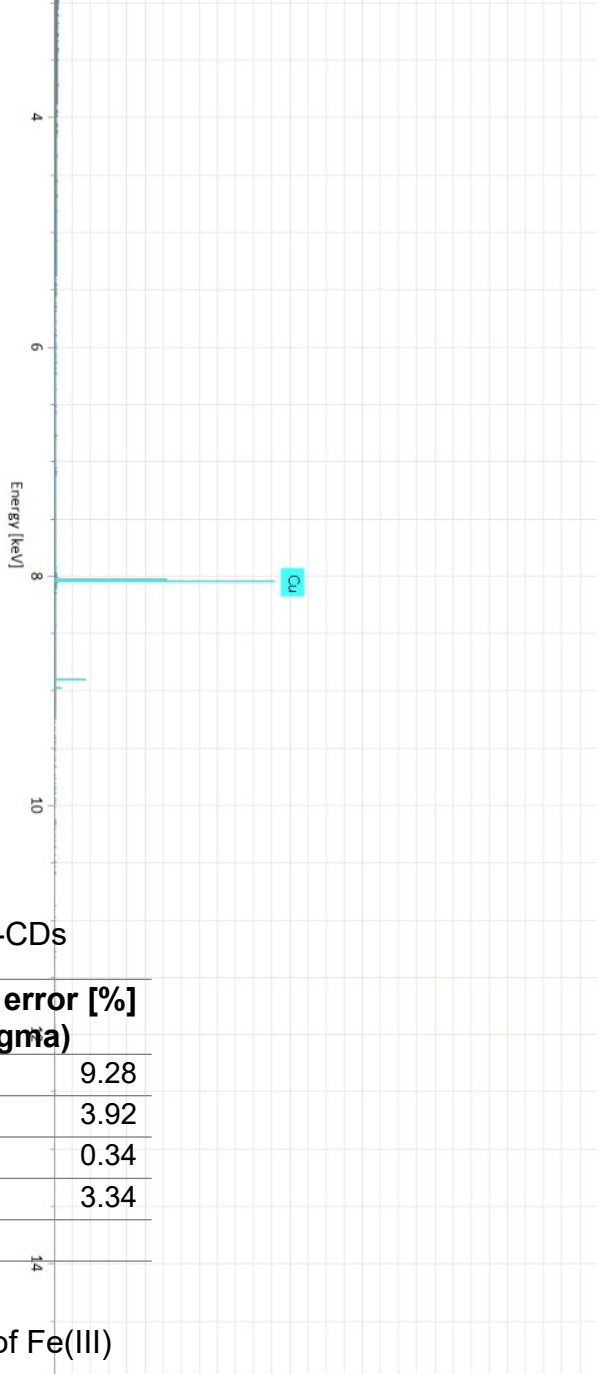

**Figure S1.** EDX analysis of Cu,N-CDs

**Table S4.** Results of EDX scan of Cu,N-CDs

| Element   | Mass Norm. [%] | Atom [%] | abs. error [%] (1 sigma) |
|-----------|----------------|----------|--------------------------|
| <b>C</b>  | 68.06          | 75.06    | 9.28                     |
| <b>O</b>  | 18.28          | 15.13    | 3.92                     |
| <b>Cu</b> | 4.23           | 0.88     | 0.34                     |
| <b>N</b>  | 9.43           | 8.92     | 3.34                     |
|           | 100.00         | 100.00   |                          |

**Table S5.** Calculating limit of detection of Fe(III)

| Fe(III) (nM) | F <sub>0</sub> /F |
|--------------|-------------------|
| 10           | 1.09              |
| 20           | 1.11              |
| 50           | 1.18              |
| 100          | 1.25              |
| 200          | 1.3               |
| 500          | 1.25              |
| 1000         | 1.3               |
| 2000         | 1.71              |
| 5000         | 2.58              |
| 10000        | 8.72              |
| 20000        | 15.84             |
| 50000        | 33.19             |
| 100000       | 50.32             |

|                                      |          |
|--------------------------------------|----------|
| <b>Slope</b>                         | 0.000658 |
| <b>Standard error for slope</b>      | 1.85E-05 |
| <b>R<sup>2</sup></b>                 | 0.992123 |
| <b>F statistic</b>                   | 1259.575 |
| <b>Regression sum of squares</b>     | 1026.17  |
| <b>Intercept</b>                     | 1.006347 |
| <b>Standard error for intercept</b>  | 0.294505 |
| <b>Standard error for Y estimate</b> | 0.902605 |
| <b>Degrees of freedom</b>            | 10       |
| <b>Residual sum of squares</b>       | 8.146952 |
| <b>K<sub>sv</sub> (1/M)</b>          | 6.58E+05 |
| <b>LOD (nM)</b>                      | 1477.591 |

**Table S6.** Calculating limit of detection of Cr(VI)

| Cr(VI) (nM) | F <sub>0</sub> /F |
|-------------|-------------------|
| 10          | 1.004678          |
| 25          | 1.012013          |
| 50          | 1.069548          |
| 75          | 1.097959          |
| 100         | 1.182746          |
| 250         | 1.409411          |

  

|                                      |          |
|--------------------------------------|----------|
| <b>Slope</b>                         | 0.001732 |
| <b>Standard error for slope</b>      | 8.85E-05 |
| <b>R<sup>2</sup></b>                 | 0.989663 |
| <b>F statistic</b>                   | 382.9678 |
| <b>Regression sum of squares</b>     | 0.113968 |
| <b>Intercept</b>                     | 0.982189 |
| <b>Standard error for intercept</b>  | 0.010304 |
| <b>Standard error for Y estimate</b> | 0.017251 |
| <b>Degrees of freedom</b>            | 4        |
| <b>Residual sum of squares</b>       | 0.00119  |
| <b>K<sub>sv</sub> (1/M)</b>          | 1.73E+06 |
| <b>LOD (nM)</b>                      | 19.63523 |

**Table S7.** Comparison of CD-based fluorescent probes for Fe(III) and Cr(VI) detection

| <b>Fe(III) detection</b>                 |                  |                         |        |               |      |
|------------------------------------------|------------------|-------------------------|--------|---------------|------|
| Material                                 | Synthetic Method | Emission $\lambda$ (nm) | QY (%) | LOD           | Ref. |
| N-CQDs (citric acid/o-phenylenedia mine) | Hydrothermal     | 483                     | 33.55% | 0.177 $\mu$ M | (7)  |
| N-CDs (citric acid/o-phenylenedia mine)  | Hydrothermal     | 535                     | 30.2%  | 13.8 nM       | (8)  |
| N-CDs (carboxymethyl cellulose/LPEI)     | Hydrothermal     | 465.5                   | 44%    | 0.14 $\mu$ M  | (9)  |
| N-CQDs                                   | Microwave-       | 399                     | 9.5%   | 2.54 $\mu$ M  | (10) |

|                                                 |                                          |            |              |                                      |                  |  |
|-------------------------------------------------|------------------------------------------|------------|--------------|--------------------------------------|------------------|--|
| (pumpkin seeds)                                 | assisted                                 |            |              |                                      |                  |  |
| CDs (glutamic acid/ethylenediamine)             | Microwave-assisted                       | 459        | 12.45%       | 3.8 $\mu\text{M}$                    | (11)             |  |
| N-CDs (guanidinium chloride/citric acid)        | Pyrolysis with water, 225°C, 12min       | 425        | 19.2         | 100 nM                               | (12)             |  |
| N-CDs (ethylenediamine/citric acid monohydrate) | Pyrolysis with water, 120°C, 48h         | 450        | 65.5%        | 0.703 $\mu\text{M}$                  | (13)             |  |
| <b>Cu,N-CDs (PAS/Cu(acac)<sub>2</sub>)</b>      | <b>Solvent-free pyrolysis, 170°C, 3h</b> | <b>495</b> | <b>14.9%</b> | <b>1.48 <math>\mu\text{M}</math></b> | <b>This work</b> |  |
| <b>Cr(VI) detection</b>                         |                                          |            |              |                                      |                  |  |
| Cu-CDs (citric acid/urea/CuCl <sub>2</sub> )    | Hydrothermal                             | 438        | 27.3         | 0.186 $\mu\text{M}$                  | (14)             |  |
| CDs (EDTA salt)                                 | Hydrothermal                             | 550        | —            | 10 $\mu\text{M}$                     | (15)             |  |
| N,S-CDs (citric acid/L-cysteine)                | Microwave-hydrothermal                   | 420        | 49.3         | 58 nM                                | (16)             |  |
| N,S-CDs (citric acid/L-glutathione)             | Pyrolysis, 270°C, 2h                     | 418        | 69           | 102 nM                               | (17)             |  |
| N-CDs (citric acid)                             | Pyrolysis,                               | 448        | 16.2         | 0.3 $\mu\text{M}$                    | (18)             |  |

|                                            |                                          |            |              |                |                  |
|--------------------------------------------|------------------------------------------|------------|--------------|----------------|------------------|
| acid/glutamic acid)                        | 200°C, 40min                             |            |              |                |                  |
| <b>Cu,N-CDs (PAS/Cu(acac)<sub>2</sub>)</b> | <b>Solvent-free pyrolysis, 170°C, 3h</b> | <b>495</b> | <b>14.9%</b> | <b>19.6 nM</b> | <b>This work</b> |

## References

1. Prado MB, Truong NT, Wanekaya AK. Improving the quantum yield of nitrogen-doped carbon dots by varying dopant ratios and pH. *Sens Actuator Rep.* 2023 Dec 1;6:100165. doi:10.1016/j.snr.2023.100165
2. Zhou R, Chen C, Hu J, Liao X, Hu H, Tong Z, et al. The self-nitrogen-doped carbon quantum dots derived from *Morus alba* L. leaves for the rapid determination of tetracycline. *Ind Crop Prod.* 2022 Nov 15;188:115705. doi:10.1016/j.indcrop.2022.115705
3. Nguyen KG, Baragau IA, Gromicova R, Nicolaev A, Thomson SAJ, Rennie A, et al. Investigating the effect of N-doping on carbon quantum dots structure, optical properties and metal ion screening. *Sci Rep.* 2022 Aug 15;12(1):13806. doi:10.1038/s41598-022-16893-x
4. Tang X, Yu H, Bui B, Wang L, Xing C, Wang S, et al. Nitrogen-doped fluorescence carbon dots as multi-mechanism detection for iodide and curcumin in biological and food samples. *Bioact Mater.* 2021 Jun 1;6(6):1541–54. doi:10.1016/j.bioactmat.2020.11.006
5. Yang Z, Xu M, Liu Y, He F, Gao F, Su Y, et al. Nitrogen-doped, carbon-rich, highly photoluminescent carbon dots from ammonium citrate. *Nanoscale.* 2014 Jan 16;6(3):1890–5. doi:10.1039/C3NR05380F
6. Xu M, He G, Li Z, He F, Gao F, Su Y, et al. A green heterogeneous synthesis of N-doped carbon dots and their photoluminescence applications in solid and aqueous states. *Nanoscale.* 2014 Aug 8;6(17):10307–15. doi:10.1039/C4NR02792B
7. Lai C, Lin S, Xiong L, Wu Y, Liu C, Jin Y. High quantum yield nitrogen-doped carbon quantum dots: green synthesis and application as “on-off” fluorescent sensors for specific Fe<sup>3+</sup> ions detection and cell imaging. *Diamond Relat Mater.* 2023 Mar;133:109702. doi:10.1016/j.diamond.2023.109702
8. Hashemi N, Mousazadeh MH. Preparation of fluorescent nitrogen-doped carbon dots for highly selective on-off detection of Fe<sup>3+</sup> ions in real samples. *Opt Mater.* 2021 Nov;121:111515. doi:10.1016/j.optmat.2021.111515
9. Issa MA, Abidin ZZ, Sobri S, Rashid SA, Mahdi MA, Ibrahim NA. Fluorescent recognition of Fe<sup>3+</sup> in acidic environment by enhanced-quantum yield N-doped carbon dots: optimization of variables using central composite design. *Sci Rep.* 2020 Jul 16;10(1):11710. doi:10.1038/s41598-020-68390-8
10. Selvaraj H, Bruntha G, Ilangovan A. Synthesis of carbon dots via microwave-assisted process: specific sensing of Fe(III) and antibacterial activity. *J Fluoresc.* 2024 Jul 13;35(6):4355–65. doi:10.1007/s10895-024-03845-z
11. Chen Y, Sun X, Pan W, Yu G, Wang J. Fe<sup>3+</sup>-sensitive carbon dots for detection of Fe<sup>3+</sup> in aqueous solution and intracellular imaging of Fe<sup>3+</sup> inside fungal cells. *Front Chem.* 2020 Jan 15;7:911. doi:10.3389/fchem.2019.00911
12. Akram Z, Arshad A, Tehseen M, Mehdi M, Raza A, Shi Y, et al. Green synthesis of a reversible “ON-OFF-ON” fluorescent sensor for Fe<sup>3+</sup> using licorice-derived N-doped carbon dots. *J Fluoresc.* 2026 Jan 13;36(3):2099–113. doi:10.1007/s10895-025-04700-5

13. Li Y, Chen J, Wang Y, Li H, Yin J, Li M, et al. Large-scale direct pyrolysis synthesis of excitation-independent carbon dots and analysis of ferric (III) ion sensing mechanism. *Appl Surf Sci.* 2021 Feb;538:148151. doi:10.1016/j.apsusc.2020.148151
14. Sudan S, Kaushal J, Singh TG, Mahmoud MH, Alexiou A, Papadakis M, et al. Eco-friendly sensing of hexavalent chromium ions via copper-doped carbon quantum dots: a fluorescent probe for water safety. *Microchim Acta.* 2025 Feb;192(2):88. doi:10.1007/s00604-024-06939-4
15. Yang Y, Chen X, Wang Y, Wu M, Ma Y, Yang X. A novel fluorescent test papers based on carbon dots for selective and sensitive detection of Cr(VI). *Front Chem.* 2020 Dec 1;8:595628. doi:10.3389/fchem.2020.595628
16. Nelson DJ, Gowthaman NSK, Sinduja B, Sethuraman MG. A facile and rapid detection of Cr(VI) and ascorbic acid using N,S-co-functionalized carbon dots: a dual-mode “on-off-on” fluorescent sensor. *Talanta Open.* 2025 Aug;11:100472. doi:10.1016/j.talo.2025.100472
17. Vaz R, Bettini J, Júnior JGF, Lima EDS, Botero WG, Santos JCC, et al. High luminescent carbon dots as an eco-friendly fluorescence sensor for Cr(VI) determination in water and soil samples. *J Photochem Photobiol, A.* 2017 Sep;346:502–11. doi:10.1016/j.jphotochem.2017.06.047
18. Zhang Y, Fang X, Zhao H, Li Z. A highly sensitive and selective detection of Cr(VI) and ascorbic acid based on nitrogen-doped carbon dots. *Talanta.* 2018 May;181:318–25. doi:10.1016/j.talanta.2018.01.027
